# Subsurface swimming and stationary diving are metabolically cheap in adult Pacific walruses (*Odobenus rosmarus divergens*)

Alicia Borque-Espinosa<sup>1,2,\*</sup>, Karyn D. Rode<sup>3</sup>, Diana Ferrero-Fernández<sup>4</sup>, Anabel Forte<sup>1</sup>, Romana Capaccioni-Azzati<sup>1</sup>, and Andreas Fahlman<sup>2,5</sup>

<sup>1</sup>*Universitat de València, Av. de Blasco Ibáñez 13, 46010 Valencia, Spain.*

<sup>2</sup>*Fundación Oceanogràfic de la Comunitat Valenciana, Gran Vía Marqués del Turia 19, 46005 Valencia, Spain.*

<sup>3</sup>*U.S. Geological Survey Alaska Science Center, , 4210 University Dr, Anchorage, 99508 AK, USA.*

<sup>4</sup>*Avanqua Oceanogràfic S.L., Eduardo Primo Yúfera (Científic) 1ºB, 46013 Valencia, Spain.*

<sup>5</sup>*Global Diving Research, Inc. Ottawa, K2J 5E8 ON, Canada.*

\*Corresponding author e-mail: ali\_bor@hotmail.com

**Keywords:** Metabolic rate, Energetics, Diving, Swimming, *Odobenus rosmarus*, Walrus.

**Summary statement:** Measured metabolic rate in three adult female Pacific walruses during stationary dives was lower from that measured during subsurface swimming and while floating at the water surface.

## Abstract

Walrus rely on sea-ice to efficiently forage and rest between diving bouts while maintaining proximity to prime foraging habitat. Recent declines in summer sea ice have resulted in walrus hauling out on land where they have to travel farther to access productive benthic habitat while potentially increasing energetic costs. Despite the need to better understand the impact of sea ice loss on energy expenditure, knowledge about metabolic demands of specific behaviours in walrus is scarce. In the present study, 3 adult female Pacific walrus (*Odobenus rosmarus divergens*) participated in flow-through respirometry trials to measure metabolic rates while floating inactive at the water surface during a minimum of 5 min, during a 180-second stationary dive, and while swimming horizontally underwater for ~90 m. Metabolic rates during stationary dives ( $3.82 \pm 0.56 \text{ l O}_2 \text{ min}^{-1}$ ) were lower than those measured at the water surface ( $4.64 \pm 1.04 \text{ l O}_2 \text{ min}^{-1}$ ), which did not differ from rates measured during subsurface swimming ( $4.91 \pm 0.77 \text{ l O}_2 \text{ min}^{-1}$ ). Thus, neither stationary diving nor subsurface swimming resulted in metabolic rates above those exhibited by walrus at the water surface. These results suggest that walrus minimize their energetic investment during underwater behaviours as reported for other marine mammals. Although environmental factors experienced by free-ranging walrus (e.g., winds or currents) likely affect metabolic rates, our results provide important information for understanding how behavioural changes affect energetic costs and can be used to improve bioenergetics models aimed at predicting the metabolic consequences of climate change on walrus.

## 1. Introduction

The Pacific walrus (*Odobenus rosmarus divergens*) inhabits a region of the Arctic that is experiencing some of the most rapid loss of summer sea ice (Laidre et al., 2015; Markus et al., 2009). The sea ice is a critical habitat for this species as it provides a location for resting between foraging bouts, and immediate access to their benthic offshore foraging habitat (Fay, 1982). The sea ice platform is also used for breeding, and females and young walrus usually haul out onto sea ice throughout the year, while adult males haul out on sea ice primarily during winter and spring (Fay, 1982). In recent years, sea ice has retreated beyond the continental shelf in the eastern Chukchi Sea in the fall (Markus et al., 2009). In response, female and young walrus are hauling out in

large numbers on land during the summer where they either forage for nearshore prey, or travel farther to more productive benthic habitats in offshore areas (Jay et al., 2012). Walrus with only access to land in the summer spend more time in water while not foraging, and less time hauled out resting as compared with walrus with access to sea ice habitats (Jay et al., 2017). In addition, walrus hauling out on land on the northwest coast of Alaska have been documented to migrate to the coast of northern Chukotka in September and October when sea ice is sometimes preserved (Jay et al., 2012). This migration occurs with minimal foraging activity but provides the opportunity to maintain offshore locations (Jay et al., 2012). Migration and foraging travel to maintain access to feeding habitat may increase energetic costs while decreasing energy intake, which could have implications on individual health, survival, and breeding success (MacCracken, 2012). For instance, female walrus increase body size and lipid deposition during pregnancy to support early lactation, but only 27% of caloric requirements during lactation are met by body reserves (Noren et al., 2014). Thus, foraging during lactation is critical for calf survival, and walrus population dynamics are known to be sensitive to successful calf survival (Udevitz et al., 2013). Furthermore, projections of female walrus behaviour with continued sea ice loss suggest that these activity patterns (less time invested on resting and foraging) will become more common in the future (Udevitz et al., 2017).

Understanding the implications of changing behavioural patterns for walrus energetic balance requires information on the energetic demands or metabolic rate associated with individual behaviours. Satellite radio tags deployed on walrus can record location, pressure and conductivity that identify whether a walrus is likely in water foraging or not foraging or hauled out (Fischbach and Jay, 2016; Jay et al., 2006). This information was recently used in combination with estimated metabolic rates of different behaviours to develop a bioenergetic model for female walrus that allowed prediction of how changes in behaviour in response to sea ice loss or other factors might affect walrus energetic costs. However, model outcomes were most sensitive to estimates of the cost of activity in water (Noren et al., 2012; Udevitz et al., 2017), which has not been directly measured in adult walrus. Data on metabolic rates of walrus are currently limited to a study that reported field metabolic rate (FMR) in two free-ranging adult males (Acquarone et al., 2006), and a study that measured metabolic rates of juveniles while resting in water or during horizontal subsurface swimming (Rosen,

2020). FMR in the two free-ranging adult male Atlantic walrus was measured using doubly-labelled water, which provided estimates of the total energetic costs, but not the energetic costs associated with individual behaviours (Acquarone et al., 2006). More recently, Rosen (2020) reported the first data of activity-associated energetic costs in two trained juvenile walrus. Although these first studies have provided important information to help understand the energetic requirements in this species, we still lack direct measurements of the metabolic cost of specific behaviours for adults.

To increase our understanding about the energetic expenditure in the walrus, the present study aimed to measure the metabolic rate during three different in water behaviours using flow-through respirometry. Three adult female Pacific walrus were trained to perform the experimental procedures for measuring the  $O_2$  consumption rate ( $\dot{V}O_2$ , l  $O_2$  min<sup>-1</sup>) while: 1) inactive floating at the water surface (*surface*), and during 2) shallow stationary dives (*stationary*), and 3) horizontal subsurface swimming (*swim*). We hypothesized that the  $\dot{V}O_2$  would be lower for stationary dives and subsurface swimming compared to periods while floating at the surface as previously reported for other pinniped species (Castellini et al., 1992; Fahlman et al., 2013; Hurley and Costa, 2001; Reed et al., 1994; Sparling and Fedak, 2004). In addition, we also hypothesized that the  $\dot{V}O_2$  would be higher during subsurface swimming than that measured during stationary dives.

## 2. Materials and Methods

### 2.1. Study subjects and training methodology

Three adult (not spayed) female Pacific walrus (*Odobenus rosmarus divergens*, Illiger, 1815) born in 2003 and housed at the Oceanogràfic (Valencia, Spain), participated in the present study. Prior to initiating the data collection, the animals underwent 7 months of desensitization to the respirometry equipment and were trained to perform the different experiments using operant conditioning. This allowed for data collection in a relaxed physiological state, where the animals were free to decide their participation in each experimental trial and could withdraw at any point. The health of the walrus was assessed daily, and all experiments were approved by the Animal Care and Welfare Committee of Fundació Oceanogràfic de la Comunitat Valenciana

(Animal Care number: OCE-1-18), and the Animal Care and Use Committee of the U.S. Geological Survey Alaska Science Centre (Review code 2020-01).

## 2.2. General procedures and experimental variables

Data collection took place between August 2018 and November 2019. No data were collected during the reproductive season (from around February to March in the study subjects), due to low interest in participation of the individuals. Body mass ( $M_b$ , kg) was measured before the first feeding in the morning the same week of the metabolic trial ( $\pm$  0-4 days from data collection) and ranged from 682 to 1035 kg ( $n = 3$ , average  $\pm$  standard deviation [s.d.] =  $842 \pm 116$  kg) during the overall experimental period. Ambient pressure, temperature and humidity were measured before commencing each experimental trial (thermometer and hygrometer OH513 Oh Haus & Co), and averaged, respectively,  $102.0 \pm 0.6$  kPa (range = 100.9-103.3 kPa.),  $19.1 \pm 2.8^\circ\text{C}$  (range = 13.0-25.0 $^\circ\text{C}$ ), and  $69 \pm 7\%$  (range = 53-84%), during data collection period. The animals were postabsorptive during the metabolic measurements and had not had a meal for at least 15h prior to initiating the experimental trials, but some food reinforcement was provided during the last minute of most respirometry trials to help reinforce the required experimental behaviour. The regular diet included a mixture of fish (capelin and herring) and molluscs (squid and mussels) supplemented with vitamins. The estimated energy intake ( $\text{kJ}_{\text{est}}$ , kJ) during each metabolic trial was calculated using the measured amount of consumed food (kg) and the measured energetic content for each type of food ( $\text{kJ kg}^{-1}$ ). This energetic content was estimated in-house through bomb calorimetry of random samples of the food items that arrived at the aquarium.

All metabolic measurements were conducted in a 3 m deep seawater pool with a total water volume of 267  $\text{m}^3$ . The water temperature at the facility was measured daily and ranged from 12.9 to 18.6 $^\circ\text{C}$  (average =  $15.9 \pm 1.0^\circ\text{C}$ ) during the overall experimental period. Data collection was performed using an open flow respirometry system described below in this section. The animals were trained to surface into a respirometry dome and keep breathing inside the respirometer while floating in a relaxed and inactive state. The walrus showed some corporal movement while maintaining the required position inside the respirometer. Consequently, the animals were not quiescent throughout the whole duration of the experimental trials. The measured changes in  $\text{O}_2$  and  $\text{CO}_2$  content of the air exiting the respirometry dome

relative to atmospheric air were used to estimate the  $\dot{V}O_2$  and the  $CO_2$  production rate ( $\dot{V}CO_2$ ,  $l\ CO_2\ min^{-1}$ ) for each experimental trial. The estimated  $\dot{V}O_2$  was used to define the metabolic rate for the three in water behaviours: 1) while floating at the water surface (metabolic rate at the surface [ $MR_{Surface}$ ,  $l\ O_2\ min^{-1}$ ]), and during 2) shallow stationary dives (diving metabolic rate during stationary dives [ $DMR_{Stationary}$ ,  $l\ O_2\ min^{-1}$ ]), or 3) subsurface swimming dives (diving metabolic rate while swimming [ $DMR_{Swim}$ ,  $l\ O_2\ min^{-1}$ ]).

The  $MR_{Surface}$  was estimated from at least 5 minutes of data collection while the walrus remained calmly floating inside the respirometer. For  $DMR_{Stationary}$  measurements, the walrus was directed to submerge to a fixed point at the bottom of the pool and to remain stationary while holding its breath for at least 3 minutes. For the  $DMR_{Swim}$  estimation, the animal swam back and forth between two underwater target poles that were positioned approximately  $\sim 7$  m apart, until reaching  $\sim 90$  meters of horizontal subsurface swimming. The walruses swam at a depth of  $\sim 1.5$  m, and all trials were timed to calculate the swimming velocity. These methods are similar to the swimming trials conducted with juvenile walruses in Rosen (2020). To determine either  $DMR_{Stationary}$  or  $DMR_{Swim}$ , the walrus was guided to surface inside the respirometry dome at completion of the dives to measure the gas exchange during the post-dive recovery period. The post-dive recovery period ended when the  $\dot{V}O_2$  and  $\dot{V}CO_2$  had returned to similar values recorded during the last portion of  $MR_{Surface}$  measurements, and remained stable for at least 1 min. Exploratory trials prior to data collection showed that the  $\dot{V}O_2$  and  $\dot{V}CO_2$  returned to steady values within the range ( $\pm$  s.d.) of those measured during  $MR_{Surface}$  trials between  $\sim 4$  min and  $\sim 6$  min for the stationary dives and subsurface swimming, respectively (see an example in Fig. 1). Therefore, to ensure the inclusion of the entire physiological recovery for all the trials, the post-dive recovery period was extended respectively to 5 minutes and 7 minutes for the stationary dives and subsurface swimming.

### 2.3. Respiratory gas exchange measurements

The open-flow respirometry system (Fig. 2) consisted of a vacuum pump (FlowKit Mass Flow Generator, FK-500-1, Sable Systems Int., Las Vegas, NV, USA) pulling air through a floating transparent Plexiglas dome of 120 cm internal diameter

(i.d.) via an 800 cm length and 4.5 cm i.d. plastic corrugated tube. The dome was made buoyant by attaching polyethylene foam to the base. A flow-through rate of 500 l min<sup>-1</sup> of air assured that the O<sub>2</sub> and CO<sub>2</sub> were maintained > 19% and < 2%, respectively. The O<sub>2</sub> and CO<sub>2</sub> content were measured using a fast-response gas analyser (Gemini Respiratory Gas Analyzer, part no. 14-1000, CWE Inc., Allentown, PA, USA), which pulled a subsample of the outlet air from the corrugated tube at a flow rate of 200 ml min<sup>-1</sup> via a 310 cm length and 2 mm i.d. firm walled, flexible tubing. This flexible tubing was attached to a hydrophobic filter (13 mm i.d.), followed by a 60 cm length and 1.5 mm i.d. Nafion© sample line connected to the gas analyser. The gas analyser was routinely calibrated using ambient air and a commercial gas mixture (5% O<sub>2</sub>, 5% CO<sub>2</sub>, and 90% N<sub>2</sub>; UN1956 Air Liquide, USA). Both, respiratory gas concentrations and air flow rates were captured at 400 Hz using a data acquisition system (Powerlab 8/35, ADInstruments, Colorado Springs, CO, USA), and displayed on a laptop computer running Labchart (v. 8.1, ADInstruments). A simultaneous CO<sub>2</sub> and N<sub>2</sub> dilution test was conducted to evaluate the system for possible leaks, and to assess the accuracy in measured O<sub>2</sub> and CO<sub>2</sub> concentrations (Fahlman et al., 2008; Fedak et al., 1981), which were within 6% of estimated values. The effective volume of the system was 465 l, which resulted in a time constant of 0.93 min (Bartholomew et al., 1981). The time required to reach a 95% fractional transformation to a new steady state was 167 s (2.79 min) or 3 times the time constant (Bartholomew et al., 1981; Fahlman et al., 2007).

#### 2.4. Data processing and criteria for data inclusion

The gas analyser baseline drift during an experimental trial was corrected by measuring the ambient air concentrations at the end of the trial. The mass flow generator automatically corrected flow rates to standard temperature and pressure conditions (STP), and measured flow was corrected for humidity inside the respirometry dome to standard temperature and pressure dry (STPD, Quanjer et al., 1993). Corrected flow rates and measured gas concentrations were then multiplied to calculate the instantaneous  $\dot{V}O_2$  and  $\dot{V}CO_2$ , which were corrected for variation in the respiratory exchange ratio (Withers, 1977).

The following criteria were used to include a metabolic trial in the analysis. For all trials, the walrus had to remain calm with all breaths taken inside the respirometer. For experiments while floating at the surface, the walrus had to remain at least 5 min inside the respirometer. For diving trials, the walrus had to 1) complete the pre-determined dive duration of 3 min for the stationary dives or the horizontal swimming distance of ~90 m for the subsurface swimming, and 2) remain inside the respirometer at least 5 min for stationary dives or 7 min for subsurface swimming during the post-dive recovery.

## 2.5. Metabolic rates calculations and conversions

To determine the total volume of  $O_2$  consumed during each experimental trial, the instantaneous  $\dot{V}O_2$  was integrated over the period from when the walrus surfaced into the respirometer, until the  $O_2$  had returned to ambient levels after leaving the respirometer (Fig. 1). Obtained  $O_2$  volume was then divided by the entire measurement period for the  $MR_{Surface}$  trials, and by the total entire dive cycle or the dive time plus the post-dive recovery time for the  $DMR_{Stationary}$  and  $DMR_{Swim}$  trials (see an example in Fig. 1).

The Kleiber ratio was calculated for each behaviour by dividing the measured  $\dot{V}O_2$  by the predicted basal metabolic rate ( $BMR_{est}$ ,  $l O_2 \text{ min}^{-1}$ ) for a similarly sized terrestrial mammal ( $BMR_{est} = 0.0093 M_b^{0.75} l O_2 \text{ min}^{-1}$ ; Kleiber, 1975). The  $\dot{V}CO_2$  for each behaviour was computed as described for  $\dot{V}O_2$  and used to determine the respiratory exchange ratio (RER,  $\dot{V}CO_2$  divided by  $\dot{V}O_2$ ). The mass-specific metabolic rate was calculated for each experimental procedure (floating at the surface:  $sMR_{Surface}$ ; stationary dives:  $sDMR_{Stationary}$ ; subsurface swimming:  $sDMR_{Swim}$ ;  $ml O_2 \text{ kg}^{-1} \text{ min}^{-1}$ ) by dividing the metabolic rate by  $M_b$  and assuming isometry. Measured metabolic rates and mass-specific conversions for the different experimental procedures were converted into daily energetic requirements as: metabolic rate ( $\text{kJ day}^{-1}$ ) =  $[(16.218 + 4.716 \times \text{RER}) \times \dot{V}O_2 \times 60 \times 24]$ . This formula is based on the assumptions that protein catabolism is negligible, while carbohydrates and lipids liberate 20.93 and 19.55 kJ per 1 litre of consumed  $O_2$ , respectively (see Table 17 in Jungas et al., 1992). The respiratory frequency ( $f_R$ ,  $\text{breaths min}^{-1}$ ) was computed for each behaviour as the number of observed breaths by the total time of the measurement period. The calculated aerobic dive limit (cADL, min) was estimated by dividing the estimated total body  $O_2$  stores by



the obtained  $DMR_{Swim}$  (Butler, 2006). The calculations to yield the total accessible body  $O_2$  stores during diving are detailed in the supplementary materials and methods section and were performed by summing the oxygen capacity of different tissues (blood, muscle, and lungs), and by estimating the level of  $O_2$  utilization from each tissue during the dive (Kooyman, 1989).

## 2.6. Statistical analysis

We initially analysed the relationship between measured  $MR_{Surface}$ ,  $DMR_{Stationary}$ ,  $DMR_{Swim}$  and the experimental covariates ( $M_b$ , and water temperature as continuous variables) using linear models (*lm* function in R; R: A Language and Environment for Statistical Computing, R Foundation for Statistical Computing, version 3.6.1, 2019). We used a backward stepping procedure implemented by the R-function *step* to identify whether  $M_b$  and water temperature were important in affecting metabolic rates, based on the combination of variables that had the lowest Akaike Information Criterion (AIC). The importance of the covariates in the final models were verified by performing the log-likelihood ratio test to confirm that the full model was better than a model containing just the intercept. Measured  $MR_{Surface}$ ,  $DMR_{Stationary}$ , and  $DMR_{Swim}$  were then compared using an ANCOVA F test that included the experiment as a fixed factor, and the covariates identified from the backward stepping procedure as independent variables. The animal identification (ID) was initially included as a random effect to account for the correlation between repeated measurements on the same individual (Littell et al., 1998), but was removed from the models due to its strong correlation with  $M_b$ . A Tukey HSD Post Hoc test was used to determine whether  $DMR_{Stationary}$ , and  $DMR_{Swim}$  were different from  $MR_{Surface}$ . For all analyses  $M_b$  and  $\dot{V}O_2$  were transformed using the base 10 logarithm. Homoscedasticity and normality were assessed through evaluation of residual plots. In the present study,  $p$ -values  $\leq 0.05$  were considered significant, and data are presented as the mean  $\pm$  s.d.

### 3. Results

#### 3.1. Total and selected trials, and experimental variables

The three female Pacific walrus participated in a total of 108 respirometry experimental trials including training and sampling sessions (2018:  $n = 20$  trials, 2019:  $n = 88$  trials). From the total experimental trials, 5 trials for each animal and behaviour ( $n = 45$  for all animals and behaviours) passed the selection criteria to be included in the analysis. For selected trials, the measured  $M_b$  ranged from 688 kg to 1030 kg ( $835 \pm 112$  kg, Table 1), and the  $\text{kJ}_{\text{est}}$  ranged from 96 kJ to 6238 kJ ( $n = 44$ ) which represented 0.1%-5.5% of the established total daily energy intake of the animals for the dates of data collection (Table 1). For trials included in the analysis, the measured humidity outside and inside the dome were, respectively,  $71 \pm 7\%$  (54 – 82%) and  $69 \pm 7\%$  (53-81%), while the ambient pressure and air temperature at the facility housing the animals were  $101.8 \pm 0.4$  kPa (100.9-102.6 kPa) and  $19.2 \pm 2.1^\circ\text{C}$  (15.4-23.1 $^\circ\text{C}$ ), respectively. The water temperature for selected trials averaged  $15.4 \pm 1.0^\circ\text{C}$  (Table 2). The backward stepping procedure showed that the elimination of the covariate “water temperature” from the model increased the AIC for  $\text{MR}_{\text{Surface}}$  trials ( $\Delta\text{AIC} = 0.313$ ) and decreased AIC for both underwater behaviours by less than 2 units ( $\text{DMR}_{\text{Stationary}}$ :  $\Delta\text{AIC} = 1.28$ ;  $\text{DMR}_{\text{Swim}}$ :  $\Delta\text{AIC} = 1.74$ ). For all experiments, the coefficient for water temperature was not significant (Wald's t test,  $p$ -value:  $\text{MR}_{\text{Surface}} = 0.18$ ;  $\text{DMR}_{\text{Stationary}} = 0.45$ ;  $\text{DMR}_{\text{Swim}} = 0.65$ ). Because water temperature either did not improve model fit or had only a minor, non-significant effect on metabolic rate, we did not include it in models comparing metabolic rates between behaviours. Alternatively, the log-likelihood ratio test showed that inclusion of  $M_b$  improved the fit of the model compared to the intercept-only model ( $p < 0.05$  for all experiments, Table 3). Therefore, we included only  $M_b$  in the ANCOVA F test comparing metabolic rates between behaviours. For each studied behaviour, measured  $M_b$ ,  $\dot{V}CO_2$ ,  $f_R$ , and RER are reported in Table S1 in the supplementary table section, while measured  $\dot{V}O_2$  for each participating walrus and behaviour is reported in terms of daily energetic requirements in Table S2.

### 3.2. Metabolic rate while floating at the water surface

The average duration for  $MR_{\text{Surface}}$  trials was  $5.7 \pm 0.6$  min (Table 2). The average  $MR_{\text{Surface}}$  ( $4.64 \pm 1.04$  l  $O_2$   $\text{min}^{-1}$ , Table 4) was higher than the predicted  $BMR_{\text{est}}$  for a similarly sized terrestrial mammal ( $1.55 \pm 0.17$  l  $O_2$   $\text{min}^{-1}$ , Fig. 3), and the Kleiber ratio was higher than 1 for all animals ( $3.0 \pm 0.5$ ; range: 2.3-3.9). The  $MR_{\text{Surface}}$  increased with  $M_b$  with a mass-exponent close to 1 (Table 3 and Fig. 3).

### 3.3. Metabolic rates during stationary dives and subsurface swimming

The average breath-hold duration for stationary dives and subsurface swimming were  $3.2 \pm 0.1$  min and  $1.6 \pm 0.2$  min, respectively (Table 2), with an average swimming velocity of  $1.0 \pm 0.1$  m  $s^{-1}$  (range: 0.9-1.3 m  $s^{-1}$ ) during the subsurface swimming. The average post-dive recovery duration for  $DMR_{\text{Stationary}}$  trials was  $5.2 \pm 0.1$  min, and  $7.2 \pm 0.1$  min for  $DMR_{\text{Swim}}$  trials (Table 2). The  $MR_{\text{Surface}}$  differed from those measured during the underwater behaviours (One-way ANCOVA F-test,  $F [2, 41] = 16.48$ ,  $p < 0.05$ , Fig. 3), where the  $DMR_{\text{Stationary}}$  ( $3.82 \pm 0.56$  l  $O_2$   $\text{min}^{-1}$ , Table 4) was significantly lower as compared with  $MR_{\text{Surface}}$  (Tukey HSD test, Mean difference = -0.071, 95% CI [-0.117, -0.026],  $p < 0.05$ ), while  $DMR_{\text{Swim}}$  ( $4.91 \pm 0.77$  l  $O_2$   $\text{min}^{-1}$ , Table 4) and  $MR_{\text{Surface}}$  did not differ (Tukey HSD test, Mean difference = 0.034, 95% CI [-0.011, 0.080],  $p < 0.05$ ). The Kleiber ratio, was higher than 1 for all animals and underwater behaviours (Fig. 3) and averaged  $2.5 \pm 0.3$  (range = 1.9-2.8) for stationary dives, and  $3.2 \pm 0.3$  (range = 2.6-3.5) for subsurface swimming. For an 835 kg adult female walrus the cADL was 7.7 min.

## 4. Discussion

In this study, we report the first metabolic rate estimates from adult individuals of the largest pinniped species yet studied while floating at the water surface and during stationary dives and subsurface swimming in a controlled environment. Our results from the three adult female Pacific walruses are similar to those previously reported for post-absorptive adult pinnipeds, where measured resting metabolic rate (RMR) was 2-3 times greater as compared with  $BMR_{\text{est}}$  (Dassis et al., 2012; Fahlman et al., 2008; Fahlman et al., 2013; Hurley and Costa, 2001; Sparling and Fedak, 2004). The range for

$sMR_{\text{Surface}}$  for the adult female walrus in our study overlapped and exceeded the upper end of  $sMR_{\text{Surface}}$  measured for juvenile walrus (Rosen, 2020). We hypothesized that the  $DMR_{\text{Stationary}}$  and  $DMR_{\text{Swim}}$  would be lower than the  $MR_{\text{Surface}}$ , and that subsurface swimming would be more energetically costly than stationary dives. However, the results indicated that  $DMR_{\text{Stationary}}$  was lower than  $MR_{\text{Surface}}$  and  $DMR_{\text{Swim}}$ , while  $DMR_{\text{Swim}}$  was similar to  $MR_{\text{Surface}}$ . These results agree with previous studies in pinnipeds that showed a lower diving metabolic rate (DMR) for inactive dives compared to RMR at the surface (Castellini et al., 1992; Hurley and Costa, 2001), and other studies reporting a  $DMR_{\text{Swim}}$  lower or similar to RMR (Castellini et al., 1992; Fahlman et al., 2008; Fahlman et al., 2013; Sparling and Fedak, 2004). Our results suggest that both stationary diving and subsurface swimming are not energetically costly for walrus. Obtained  $sDMR_{\text{Swim}}$  in the present study was lower than that measured in juvenile walrus performing similar subsurface swimming trials (Rosen, 2020), and compared to measured mass-specific FMR for free-ranging adult male walrus (Acquarone et al., 2006). The estimated cADL was within the range of dive durations observed in free-ranging walrus (Acquarone et al., 2006; Born et al., 2005; Gjertz et al., 2001; Wiig et al., 1993).

#### 4.1. Metabolic rates while floating at the water surface

Measured  $MR_{\text{Surface}}$  in the present study was similar to previous studies reporting basal metabolic rate (BMR) or RMR from post-absorptive and desensitized adult pinnipeds, where measured metabolic rates were 2-3 times greater than that predicted by Kleiber's equation for terrestrial mammals (Dassis et al., 2012; Fahlman and Madigan, 2016; Fahlman et al., 2020; Fahlman et al., 2008; Fahlman et al., 2013; Hurley and Costa, 2001; Rosen, 2020; Sparling and Fedak, 2004). While the reasons for the higher measured BMR or RMR in marine mammals as compared with the predictions from Kleiber's remain unclear, it has been suggested that different methodologies and physiological states of the animals during metabolic measurements may be possible reasons for these differences (Lavigne et al., 1986). Kleiber (1975) defined the standard conditions that a study subject should accomplish to obtain comparable metabolic measurements under basal conditions or BMR: 1) reproductively mature individuals, under 2) post-absorptive state of digestion, 3) thermoneutral conditions, and 4) minimal activity level while awake. In the present study, the procedures fulfilled most of these

established criteria. The three female walrus were adults, and the experimental procedures took place following an overnight fast. Although a small amount of food was given during the last minute of the trial, this is unlikely to have significantly altered measured metabolic rates considering that it takes approximately 30 minutes to detect a metabolic increase after food ingestion (Rosen and Trites, 1997). The thermoneutral zone for walrus in water is still unknown, and the water temperatures in their natural environment at the Chukchi Sea (temperature range at the surface: from 0 to 10°C, and at 30 m depth: from -1 to 6°C, Luchin and Panteleev, 2014) are lower than those measured during selected trials in the present study (12.9-17.1°C). However, measured metabolic rates were not related to the range of water temperatures during the metabolic trials in the current study. Therefore, due to the lack of information about the thermoneutral range in this species we do not propose that the measured  $MR_{\text{Surface}}$  in the current study are estimates of BMR for the walrus.

In addition, the animals were trained to maintain a relaxed and inactive state during metabolic measurements to allow for measuring RMR, which is defined as the metabolic rate measured at rest when other conditions for BMR are not met. However, it is worth mentioning that the measured  $MR_{\text{Surface}}$  may have been higher than actual RMR because the walrus had to move to maintain their upright position inside the respirometry dome. In fact, juvenile walrus that remained motionless while in a respirometry dome (Rosen, 2020) had slightly lower  $sMR_{\text{Surface}}$  (73.1-166.1 kJ kg<sup>-1</sup> day<sup>-1</sup>) than the adult females in our study (126.3-203.9 kJ kg<sup>-1</sup> day<sup>-1</sup>, Table S2), despite that higher  $sMR_{\text{Surface}}$  is expected for juvenile individuals due to their higher mass-specific metabolic rates and investment in growth and development (Costa, 1993). Other studies have similarly noted difficulty maintaining the animals motionless when in water (Dassis et al., 2012; Fahlman et al., 2008). For example, in Patagonia sea lions (*Otaria flavescens*) measured RMR on land was 1.4 times lower as compared with  $MR_{\text{Surface}}$ , which was attributed to movement inside the respirometry dome (Dassis et al., 2012). Still, the movement shown by the participating walrus at the water surface in this investigation may be consistent with the actual behaviour in their natural environment, where it could be difficult to maintain a motionless position at sea surface conditions. Therefore, although the obtained Kleiber ratio for measured  $MR_{\text{Surface}}$  in the present study was similar to BMR or RMR previously reported for pinnipeds, we suggest that measured  $MR_{\text{Surface}}$  in the current study may be elevated as compared with RMR due to

observed movement while in the respirometer, but may represent a more applicable approximation of the actual  $MR_{\text{Surface}}$  for those animals in the wild. In addition, metabolic rates have been reported to scale exponentially with  $M_b$  with a mass-exponent of 0.75 (Kleiber, 1975). While in the present study obtained  $MR_{\text{Surface}}$  closely followed a linear relationship with  $M_b$  (see Table 3 and Fig. 3), the limited  $M_b$  range may not allow an appropriate analysis to determine whether the relationship is linear or exponential.

#### 4.2. Metabolic rates during stationary dives and subsurface swimming

On average,  $DMR_{\text{Stationary}}$  of the adult female walrus was lower as compared with  $MR_{\text{Surface}}$  and  $DMR_{\text{Swim}}$ , which is consistent with previous studies investigating stationary or inactive dives in pinnipeds (Castellini et al., 1992; Hurley and Costa, 2001). For example, in trained California sea lions (*Zalophus californianus*), Hurley and Costa (2001) reported lower  $DMR_{\text{Stationary}}$  than  $MR_{\text{Surface}}$  for shallow dives (see Fig. 3 in Hurley and Costa, 2001). In freely diving Weddell seals (*Leptonychotes weddellii*), Castellini et al. (1992) reported metabolic rates during short sleep or inactive apneas (<14 min) below  $MR_{\text{Surface}}$  (see Fig. 3 in Castellini et al., 1992). The same authors also reported that the overall  $DMR_{\text{Swim}}$  during free diving was 1.5 times greater than that observed for sleep apneas of similar duration (Castellini et al., 1992), which is similar to the results from our study in which  $DMR_{\text{Swim}}$  was 1.3 times greater than  $DMR_{\text{Stationary}}$ .

Alternatively,  $DMR_{\text{Swim}}$  did not differ from  $MR_{\text{Surface}}$  which agrees with previous studies in pinnipeds that showed a  $DMR_{\text{Swim}}$  close to or below RMR in freely diving animals (Castellini et al., 1992; Sparling and Fedak, 2004) or in subjects trained to swim vertically (Fahlman et al., 2008; Fahlman et al., 2013). In addition, these studies also reported a decreased  $DMR_{\text{Swim}}$  with increased dive duration, suggesting that pinnipeds can decrease their energetic investment depending on the dive requirements. This extended diving hypometabolism was first described by Scholander (1940), and was suggested to be an ability to reduce metabolism by decreasing the activity of different metabolic processes (e.g., digestion, liver and kidney function, etc.), that would increase the dive duration. While in the present study changes in DMR with increased dive duration were not assessed, our results suggest an efficient  $O_2$  use during underwater behaviours in the walrus. This physiological capability could explain the reduced  $DMR_{\text{Stationary}}$  and how measured  $DMR_{\text{Swim}}$  was similar to  $MR_{\text{Surface}}$  despite the additional energetic investment during subsurface swimming.

On the other hand, despite the similarity of the procedures during subsurface swimming trials in two juvenile walrus trained to swim horizontally for 110 m, at a depth of  $\sim 1.2$  m, and at constant velocities (male:  $1.6 \pm 0.1$  m s<sup>-1</sup>; female:  $2.1 \pm 0.1$  m s<sup>-1</sup>), the obtained average sDMR<sub>Swim</sub> (male:  $242.9 \pm 60.0$  J kg<sup>-1</sup> min<sup>-1</sup>; female:  $336.6 \pm 84.4$  J kg<sup>-1</sup> min<sup>-1</sup>; Rosen, 2020) were up to 2.8 times greater than that measured in the present study ( $121.3 \pm 7.0$  J kg<sup>-1</sup> min<sup>-1</sup>). However, Rosen (2020) noticed that the estimated cost of transport during subsurface swimming in these juvenile walrus was elevated over to that predicted for a similarly sized marine mammal, which was suggested to be related with non-optimal swimming speed and with the higher underlying maintenance costs of young individuals (Rosen, 2020). Thus, the decreased sDMR<sub>Swim</sub> reported in the adult female walrus may be partly related with the lower swim speeds ( $1.0 \pm 0.1$  m s<sup>-1</sup>) and distance (90 m) for subsurface swimming trials in the present study, but also to the decrease in mass-specific metabolic rates with age (Kleiber, 1975). In addition, obtained RER ranges for all experimental behaviours (0.81-1.06, see Table S1) were within expected values. While the RER immediately following a dive tends to change dynamically as the blood and tissues are recovering (Fahlman et al., 2008; Reed et al., 1994), the average for RER during trials at the water surface ( $0.97 \pm 0.05$ ) were similar to those obtained during the post-dive recovery period for both underwater experiments (stationary dives:  $0.94 \pm 0.07$ ; subsurface swimming:  $0.94 \pm 0.06$ ), and agreed with data reported for resting periods at the surface and for conditioned dives in Steller sea lions (see Table 1 in Fahlman et al., 2008).

When translating the results obtained in this study to free-ranging walrus, we found similar characteristics of subsurface swimming behaviour with those previously reported in free-ranging animals that were associated with travelling or exploratory behaviours (Gjertz et al., 2001; Jay et al., 2001). These dives are reported to be shallow (< 4 m), with most of them lasting < 3 min, and occurring most frequently at the beginning and ending of foraging trips (Gjertz et al., 2001; Jay et al., 2001). The associated ascent and descent swimming velocity reported for these short dives is  $\sim 0.5$  m s<sup>-1</sup>, but exceeds 1 m s<sup>-1</sup> for longer and deeper dives (Gjertz et al., 2001; Jay et al., 2001). Thus, considering that the animals in the present study performed the subsurface swimming trials at their individual comfort, and the similarities with described underwater behaviour of wild walrus, we suggest that measured DMR<sub>Swim</sub> could be considered as a suitable approximation of the energetic swimming requirements for

walruses when traveling to and from foraging areas or over long-distance migrations. However, the experimental procedures at facilities housing animals are not usually representative of the wild, and differences in underwater behaviours (e.g., social interactions, exploratory behaviours, etc.), or environmental conditions (e.g., water current, water temperature, etc.) experienced by free-ranging walruses could result in different energetic requirements during diving and swimming. This could explain why the observed  $sDMR_{swim}$  in the present study (see Table S2) is  $\sim 2/3$  lower than the mass-specific FMR measured in two male adult Atlantic walruses, as that approximation accounted for behaviours in the wild (Acquarone et al., 2006). Despite this inherent limitation, these novel metabolic measurements on adult female walruses in water, could help improve energetic requirements estimations during these travelling subsurface dives, while helping interpret measurements of FMR associated with behavioural information.

#### 4.3. Aerobic limitation estimated in the present study

The estimated cADL in the present study (7.7 min) was longer than the dive duration for both underwater behaviours (stationary dives:  $3.2 \pm 0.1$  min; subsurface swimming:  $1.6 \pm 0.2$  min), and the duration of travelling and foraging dives observed in free-ranging male Pacific walruses that were suggested to occur within the ADL (median dive duration = 7.2 min, Jay et al., 2001). Therefore, the dives by females in our study were well within the estimated cADL and likely supported by aerobic metabolism. In addition, the cADL of the walruses in this study was also longer than the average durations for most frequent dives (5-6 min) observed in adult male walruses foraging over continental shelf habitats at depths from 10 to 70 m (Acquarone et al., 2006; Gjertz et al., 2001; Wiig et al., 1993). However, walruses also take deeper and longer dives, exceeding 100 m depth (Acquarone et al., 2006) with a maximum reported dive depth of 234 m (Born et al., 2005) and a dive duration of 24 min (Gjertz et al., 2001). While, reported cADL in the present study could be overestimated due to lower energetic demands derived in laboratory conditions, if hypometabolism is related to dive duration in the walrus as in other pinnipeds, cADL may be in fact longer during extended dives. Thus, further investigations of the metabolic requirements for dives of different duration in this species would help clarify whether these animals are able to



achieve the reported prolonged dive durations (>10 min, Acquarone et al., 2006; Gjertz et al., 2001; Wiig et al., 1993) while avoiding the blood lactate accumulation.

## 5. Conclusions

Walrus are currently facing changes to their environment that have altered the availability of their sea ice habitat, which have resulted in changes in their travelling and foraging behaviour, and geographical distribution (Jay et al., 2012; Udevitz et al., 2017). This has led to an increased concern about the future of the walrus populations, raising interest in studies aimed to obtain information about basal, reproductive, or diving and swimming energetic demands (Noren et al., 2012; Noren et al., 2014; Rosen, 2020; Udevitz et al., 2017). Studies measuring the energetic costs for different behaviours and life stages will help improve the accuracy of previous energetic models to predict the potential impacts of environmental change (Udevitz et al., 2017). In the present study, we report the first direct measurements of metabolic rates in female adult Pacific walrus while floating in water and during short and shallow stationary dives and subsurface swimming. The results are consistent with previous work reporting a low energetic cost of diving in marine mammals and confirms that the walrus are able to reduce their metabolic rates during both stationary dives and subsurface swimming. These metabolic estimates would help quantify energetic consequences of reported increased in-water behaviours in the walrus (Jay et al., 2012). In addition, as a benthic feeding marine mammal, walrus spend 70-93% of their time in water of which much of this time is spent diving to the ocean floor to feed on benthic invertebrates (Jay et al., 2017; Udevitz et al., 2009). Therefore, while the data reported in this study would help improve bioenergetic models, further investigations measuring the metabolic rate for different types of dives (e.g., longer durations or higher swimming requirements), and/or environmental parameters (e.g., water temperature or wind and water current), will help quantify the effect of these parameters on metabolic rates and further improve these models. Similarly, measurements of the metabolic demands while resting on land would add relevant information that will also improve theoretical models aimed at forecasting the conservation scenario of this species.

## 6. Acknowledgments

The authors would like to thank the personnel at the Oceanogràfic (Valencia, Spain) that helped with the initial management of the experimental set up, particularly to Roberto Tejero and Daniel García-Párraga. We are especially grateful to all the animal care professionals at the Artico facility, whose perseverance, positive attitude, and enthusiasm for science and conservation made possible the accomplishment of this project (Noni, Carlos, Jose, Lara, Raúl y Guaci). A special thanks to Andrés Jabois for their constant assistance, advice, and support, and to Chad Jay at the U.S. Geological Survey who initiated and advised on this study. Lastly, thanks to several interns from Artico and Research departments that gently helped with the equipment and procedures when necessary. Any use of trade, firm, or product names is for descriptive purposes only and does not imply endorsement by the U.S. Government. We are grateful for the constructive comments provided by two anonymous referees that helped improve the final version of this article.

## 7. Competing interests

The authors declare no competing or financial interest.

## 8. Authors contributions

Conceptualization: A.B.-E., K.D.R., A.F.; Methodology: A.B.-E., D.F.-F., A.F.; Software: A.F.; Validation: A.B.-E., A.F.; Formal analysis: A.B.-E., A.Forte. A.F.; Investigation: A.B.-E., D.F.-F., A.F.; Resources: A.F.; Data curation: A.B.-E., A.F.; Writing - original draft: A.B.-E.; Writing - review & editing: K.D.R., D.F.-F., R.C.A., A.Forte, R.C.-A, A.F.; Supervision: R.C.-A., A.F.; Project administration: A.F.; Funding acquisition: A.F.

## 9. Funding

Funding for this project was provided by the U.S. Geological Survey Changing Arctic Ecosystems Initiative and Award # G18AC00011 to A.F. Fundació Oceanogràfic de la Comunitat Valenciana. Oceanogràfic provided access to animals and trainer salary support.

## 10. Data availability

Data used in this study are available and can be accessed through <https://doi.org/10.5066/P9UQVFSW>

### List of abbreviations

$\%kJ_{\text{tot}}$  = percentage of energy intake in relation to the total daily intake for the days of the experiments

ADL = Aerobic dive limit, or maximum diving time exclusively using the available O<sub>2</sub> stores

BMR = Basal metabolic rate

BMR<sub>est</sub> = Predicted basal metabolic rate

BV = Blood volume

cADL = Aerobic dive limit calculated from estimated body oxygen stores and diving metabolic rate during subsurface swimming

DMR = Diving metabolic rate

DMR<sub>Stationary</sub> = Metabolic rate measured during stationary dives

DMR<sub>Swim</sub> = Metabolic rate measured during subsurface swimming

FMR = Field metabolic rate

$f_R$  = Respiratory frequency

Hg = Haemoglobin

$kJ_{\text{est}}$  = Estimated energy intake

$M_b$  = Body mass

Mg = Myoglobin

MR<sub>Surface</sub> = Metabolic rate measured while floating at the water surface

RER = Respiratory exchange ratio

RMR = Metabolic rate measured at rest

sDMR<sub>Stationary</sub> = Mass-specific metabolic rate measured during stationary dives

sDMR<sub>Swim</sub> = Mass-specific metabolic rate measured during subsurface swimming

sMR<sub>Surface</sub> = Mass-specific metabolic rate measured while floating at the water surface

STP = Standard temperature and pressure conditions

STPD = Standard temperature and pressure dry conditions

TLC<sub>est</sub> = Estimated total lung capacity

$\dot{V}CO_2$  = Carbon dioxide production rate

$\dot{V}O_2$  = Oxygen consumption rate

## References

- Acquarone, M., Born, E. W. and Speakman, J. R.** (2006). Field metabolic rates of walrus (*Odobenus rosmarus*) measured by the doubly labeled water method. *Aquat. Mamm.* **32**, 363-369.
- Bartholomew, G. A., Vleck, D. and Vleck, C. M.** (1981). Instantaneous measurements of oxygen consumption during pre-flight warm-up and post-flight cooling in sphingid and saturniid moths. *J. Exp. Biol.* **90**, 17-32.
- Born, E. W., Acquarone, M., Knutsen, L. Ø. and Toudal, L.** (2005). Homing behaviour in an Atlantic walrus (*Odobenus rosmarus rosmarus*). *Aquat. Mamm.* **31**, 23.
- Butler, P. J.** (2006). Aerobic dive limit. What is it and is it always used appropriately? *Comp Biochem Physiol A Mol Integr Physiol* **145**, 1-6.
- Castellini, M. A., Kooyman, G. L. and Ponganis, P. J.** (1992). Metabolic rates of freely diving Weddell seals: correlations with oxygen stores, swim velocity and diving duration. *J. Exp. Biol.* **165**, 181-194.
- Costa, D. P.** (1993). Reproductive and foraging energetics of pinnipeds: Implications for life history patterns. In *The Behaviour of Pinnipeds*, (ed. D. Renouf), pp. 300-344. Dordrecht: Springer Netherlands.
- Dassis, M., Rodríguez, D. H., Ieno, E. N. and Davis, R. W.** (2012). Submerged swimming and resting metabolic rates in Southern sea lions. *J. Exp. Mar. Biol. Ecol.* **432-433**, 106-112.
- Fahlman, A., Loring, S. H., Ferrigno, M., Moore, C., Early, G., Niemeyer, M., Lentell, B., Wenzel, F., Joy, R. and Moore, M. J.** (2011). Static inflation and deflation pressure-volume curves from excised lungs of marine mammals. *J. Exp. Biol.* **214**, 3822-3828.
- Fahlman, A. and Madigan, J.** (2016). Respiratory function in voluntary participating Patagonia sea lions in sternal recumbency. *Front. Physiol.* **7**, 1-9.
- Fahlman, A., Meegan, J., Borque-Espinosa, A. and Jensen, E. D.** (2020). Pulmonary function and resting metabolic rates in California sea lions (*Zalophus californianus*) on land and in water. *Aquat. Mamm.* **46**, 67-79.
- Fahlman, A., Schmidt, A., Jones, D. R., Bostrom, B. L. and Handrich, Y.** (2007). To what extent does N<sub>2</sub> limit dive performance in king penguins? *J. Exp. Biol.* **210**, 3344-3355.
- Fahlman, A., Svärd, C., Rosen, D. A. S., Jones, D. R. and Trites, A. W.** (2008). Metabolic costs of foraging and the management of O<sub>2</sub> and CO<sub>2</sub> stores in Steller sea lions. *J. Exp. Biol.* **211**, 3573-3580.
- Fahlman, A., Svärd, C., Rosen, D. A. S., Wilson, R. S. and Trites, A. W.** (2013). Activity as a proxy to estimate metabolic rate and to partition the metabolic cost of diving vs. breathing in pre- and post-fasted Steller sea lions. *Aquat. Biol.* **18**, 175-184.
- Fay, F. H.** (1982). Ecology and biology of the Pacific walrus, *Odobenus rosmarus divergens* Illiger. *N. Am. Fauna* **74** 1-279.
- Fedak, M. A., Rome, L. and Seeherman, H. J.** (1981). One-step N<sub>2</sub>-dilution technique for calibrating open-circuit VO<sub>2</sub> measuring systems. *J. Appl. Physiol.* **51**, 772-776.
- Fischbach, A. S. and Jay, C. V.** (2016). A strategy for recovering continuous behavioral telemetry data from Pacific walruses. *Wildl. Soc. Bull.* **40**, 599-604.
- Gjertz, I., Griffiths, D., Krafft, B. A., Lydersen, C. and Wiig, Ø.** (2001). Diving and haul-out patterns of walruses *Odobenus rosmarus* on Svalbard. *Polar Biol.* **24**, 314-319.

**Hurley, J. A. and Costa, D. P.** (2001). Standard metabolic rate at the surface and during trained submersions in adult California sea lions (*Zalophus californianus*). *J. Exp. Biol.* **204**, 3273-3281.

**Jay, C. V., Farley, S. D. and Garner, G. W.** (2001). Summer diving behavior of male walrus in Bristol Bay, Alaska. *Mar. Mamm. Sci.* **17**, 617-631.

**Jay, C. V., Fischbach, A. S. and Kochnev, A. A.** (2012). Walrus areas of use in the Chukchi Sea during sparse sea ice cover. *Mar. Ecol. Prog. Ser.* **468**, 1.

**Jay, C. V., Heide-Jørgensen, M. P., Fischbach, A. S., Jensen, M. V., Tessler, D. F. and Jensen, A. V.** (2006). Comparison of remotely deployed satellite radio transmitters on walrus. *Mar. Mamm. Sci.* **22**, 226-236.

**Jay, C. V., Taylor, R. L., Fischbach, A. S., Udevitz, M. S. and Beatty, W. S.** (2017). Walrus haul-out and in water activity levels relative to sea ice availability in the Chukchi Sea. *J. Mammal.* **98**, 386-396.

**Jungas, R. L., Halperin, M. L. and Brosnan, J. T.** (1992). Quantitative analysis of amino acid oxidation and related gluconeogenesis in humans. *Physiol. Rev.* **72**, 419-48.

**Kanatous, S. B., DiMichele, L. V., Cowan, D. F. and Davis, R. W.** (1999). High aerobic capacities in the skeletal muscles of pinnipeds: adaptations to diving hypoxia. *J. Appl. Physiol.* **86**, 1247-1256.

**Kleiber, M.** (1975). *The Fire of Life: An Introduction to Animal Energetics*. New York: Krieger Publishing.

**Knutsen, L. Ø. and Born, E. W.** (1994). Body growth in Atlantic walrus (*Odobenus rosmarus rosmarus*) from Greenland. *J. Zool.* **234**, 371-385.

**Kooyman, G. L.** (1973). Respiratory adaptations in marine mammals. *Am. Zool.* **13**, 457-468.

**Kooyman, G. L.** (1989). *Diverse Divers: Physiology and Behavior*. Berlin: Springer-Verlag.

**Laidre, K. L., Stern, H., Kovacs, K. M., Lowry, L., Moore, S. E., Regehr, E. V., Ferguson, S. H., Wiig, Ø., Boveng, P., Angliss, R. P. et al.** (2015). Arctic marine mammal population status, sea ice habitat loss, and conservation recommendations for the 21<sup>st</sup> century. *Conserv. Biol.* **29**, 724-737.

**Lavigne, D. M., Innes, S., Worthy, G. A. J. and Kovacs, K. M.** (1986). Metabolic rate–body size relations in marine mammals. *J. Theor. Biol.* **122**, 123-124.

**Lenfant, C., Johansen, K. and Torrance, J. D.** (1970). Gas transport and oxygen storage capacity in some pinnipeds and the sea otter. *Respir. Physiol.* **9**, 277-286.

**Littell, R. C., Henry, P. R. and Ammerman, C. B.** (1998). Statistical analysis of repeated measures data using SAS procedures. *J. Anim. Sci.* **76**, 1216-1231.

**Luchin, V. and Panteleev, G.** (2014). Thermal regimes in the Chukchi Sea from 1941 to 2008. *Deep Sea Res. Part II Top. Stud. Oceanogr.* **109**, 14-26.

**MacCracken, J. G.** (2012). Pacific walrus and climate change: observations and predictions. *Ecol. Evol.* **2**, 2072-2090.

**Markus, T., Stroeve, J. C. and Miller, J.** (2009). Recent changes in Arctic sea ice melt onset, freezeup, and melt season length. *J. Geophys. Res. Oceans.* **114**, 1-14.

**Noren, S. R., Jay, C. V., Burns, J. M. and Fischbach, A. S.** (2015). Rapid maturation of the muscle biochemistry that supports diving in Pacific walrus (*Odobenus rosmarus divergens*). *J. Exp. Biol.* **218**, 3319-3329.

**Noren, S. R., Udevitz, M. S. and Jay, C. V.** (2012). Bioenergetics model for estimating food requirements of female Pacific walrus *Odobenus rosmarus divergens*. *Mar. Ecol. Prog. Ser.* **460**, 261-275.

**Noren, S. R., Udevitz, M. S. and Jay, C. V.** (2014). Energy demands for maintenance, growth, pregnancy, and lactation of female Pacific walruses (*Odobenus rosmarus divergens*). *Physiol. Biochem. Zool.* **87**, 837-54.

**Ponganis, P. J.** (2011). Diving mammals. *Compr. Physiol.* **1**, 517-535.

**Quanjer, P. H., Tammeling, G. J., Cotes, J. E., Pedersen, O. F., Peslin, R. and Yernault, J.-C.** (1993). Lung volumes and forced ventilatory flows. *Eur. Respir. J.* **6**, 5-40.

**Reed, J. Z., Chambers, C., Fedak, M. A. and Butler, P. J.** (1994). Gas exchange of captive freely diving grey seals (*Halichoerus grypus*). *J. Exp. Biol.* **191**, 1-18.

**Rosen, D. A. S.** (2020). Resting and swimming metabolic rates in juvenile walruses (*Odobenus rosmarus*). *Mar. Mamm. Sci.* **1**, 1-11.

**Rosen, D. A. S. and Trites, A. W.** (1997). Heat increment of feeding in Steller sea lions, *Eumetopias jubatus*. *Comp. Biochem. Physiol. A.* **118**, 877-881.

**Scholander, P. F.** (1940). Experimental investigations on the respiratory function in diving mammals and birds. *Hvalrådets Skrifter.* **22**, 1-131.

**Sparling, C. E. and Fedak, M. A.** (2004). Metabolic rates of captive grey seals during voluntary diving. *J. Exp. Biol.* **207**, 1615-1624.

**Udevitz, M. S., Jay, C. V., Fischbach, A. S. and Garlich-Miller, J. L.** (2009). Modeling haul-out behavior of walruses in Bering Sea ice. *Can. J. Zool.* **87**, 1111-1128.

**Udevitz, M. S., Jay, C. V., Taylor, R. L., Fischbach, A. S., Beatty, W. S. and Noren, S. R.** (2017). Forecasting consequences of changing sea ice availability for Pacific walruses. *Ecosphere.* **8**, 1-30.

**Udevitz, M. S., Taylor, R. L., Garlich-Miller, J. L., Quakenbush, L. T. and Snyder, J. A.** (2013). Potential population-level effects of increased haulout-related mortality of Pacific walrus calves. *Polar Biol.* **36**, 291-298.

**Wiig, Ø., Gjertz, I., Griffiths, D. and Lydersen, C.** (1993). Diving patterns of an Atlantic walrus *Odobenus rosmarus rosmarus* near Svalbard. **13**, 71-72.

**Withers, P. C.** (1977). Measurements of VO<sub>2</sub>, VCO<sub>2</sub>, and evaporative water loss with a flow-through mask. *J. Appl. Physiol.* **42**, 120-123.

**Wolk, E. and Kosygin, G. M.** (1979). A hematological study of the walrus, *Odobenus rosmarus*. *Acta Theriol. Sin.* **24**, 99-107.

## Figures and Tables

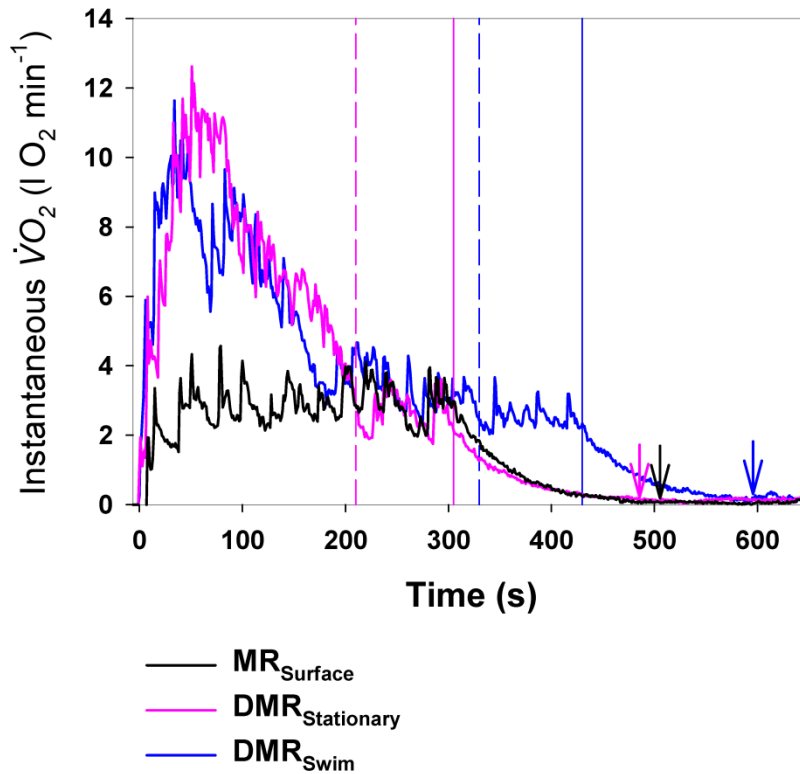

**Fig. 1. An example representation of instantaneous  $\dot{V}O_2$  measurements for one walrus during three in-water behaviours**

Measured instantaneous  $O_2$  consumption rate ( $\dot{V}O_2$ ) for one adult female Pacific walrus (*O. rosmarus divergens*, Animal ID = 26005388) during  $\dot{V}O_2$  measurements while floating at the water surface ( $MR_{Surface}$ ), and during post-dive  $\dot{V}O_2$  measurements for stationary dives ( $DMR_{Stationary}$ ) and subsurface swimming ( $DMR_{Swim}$ ). For the three experimental trials, the walrus entered the dome at time = 0 s. For the post-dive recovery period of both underwater experiments, the dashed vertical lines represent the period when the  $\dot{V}O_2$  was similar to that obtained during the last portion (~2 minutes) of  $MR_{Surface}$  measurements, while the solid vertical lines indicate the time when the walrus left the respirometer ( $DMR_{Stationary}$ : pink lines;  $DMR_{Swim}$ : blue lines). The total volume of  $O_2$  consumed for each trial was computed by integrating the instantaneous  $\dot{V}O_2$  from the walrus entered the dome until the  $O_2$  returned to ambient values (instantaneous  $\dot{V}O_2 \sim 0$ ) which is indicated by the arrows ( $MR_{Surface}$ : black;  $DMR_{Stationary}$ : pink;  $DMR_{Swim}$ : blue). For both underwater behaviours, the  $DMR_{Stationary}$  and  $DMR_{Swim}$  were computed as the total volume of consumed  $O_2$  divided by the entire dive cycle (dive duration + post-dive recovery duration). As an example, the represented  $DMR_{Stationary}$  was estimated by integrating the  $\dot{V}O_2$  until the position of the pink arrow and dividing the obtained  $O_2$  volume by the dive duration (180s) plus the duration of the measurement (304 s, i.e., when the walrus left the respirometer).

Fig. 2

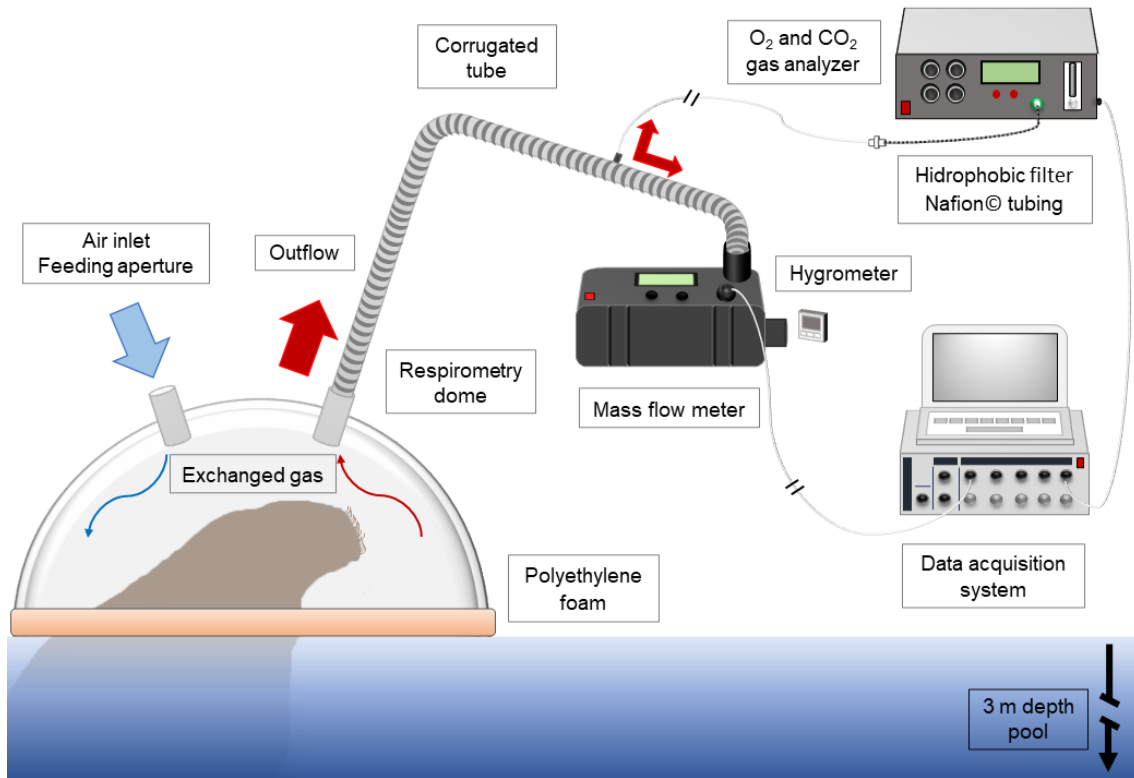

**Fig. 2. Open-flow respirometry system used to measure metabolic rates of Pacific walrus.**

Schematic diagram (unscaled) of the open-flow respirometry system set up used in the present study while measuring O<sub>2</sub> consumption and CO<sub>2</sub> production rates. The arrows show the direction of the air through the system. The grey solid lines represent the sampling connections between the different components described in Materials and methods.



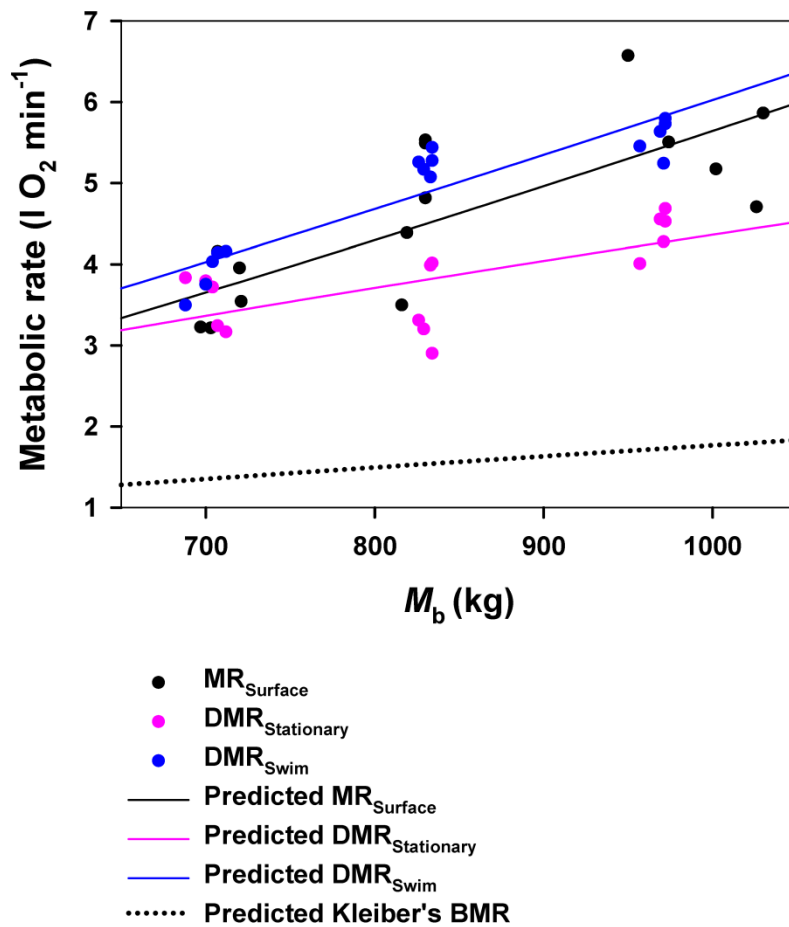

**Fig. 3. Measured metabolic rates in relation to body mass for each behaviour and participating walrus.**

Relationship between measured metabolic rates and body mass ( $M_b$ ) from three adult female Pacific walrus participating in experimental trials ( $n = 5$  per each animal and experimental procedure) while floating at the water surface ( $MR_{\text{Surface}}$ ), and during stationary dives ( $DMR_{\text{Stationary}}$ ) and subsurface swimming ( $DMR_{\text{Swim}}$ ). The solid lines represent the predicted metabolic rates ( $l\ O_2\ \text{min}^{-1}$ ) obtained from the results of the linear models reported in Table 3 ( $MR_{\text{Surface}} = 0.00123\ M_b^{1.22}$ ;  $DMR_{\text{Stationary}} = 0.0282\ M_b^{0.73}$ ;  $DMR_{\text{Swim}} = 0.00245\ M_b^{1.13}$ ). The dotted line represents the predicted Kleiber's basal metabolic rate ( $BMR_{\text{est}}\ l\ O_2\ \text{min}^{-1} = 0.00993\ M_b^{0.75}$ , Kleiber, 1975).

**Table 1. Body mass and estimated energy intake for each female walrus.**

| Animal ID | $M_b$ (kg)          | $kJ_{est}$ (kJ)                      | $\%kJ_{tot}$        |
|-----------|---------------------|--------------------------------------|---------------------|
| 26005388  | 705 ± 9 (688-721)   | 1236 ± 2108 (100-6238) <sup>15</sup> | 1.2 ± 1.9 (0.1-5.5) |
| 26005389  | 975 ± 25 (950-1030) | 1586 ± 2445 (96-6238) <sup>14</sup>  | 1.4 ± 2.1 (0.1-5.5) |
| 26005390  | 825 ± 7 (813-834)   | 207 ± 74 (100-339) <sup>15</sup>     | 0.2 ± 0.1 (0.1-0.3) |

For trials included in the analysis (n = 45), animal identification (ID) and average (± s.d) and ranges of body mass ( $M_b$ ), estimated energy intake during the experimental procedure ( $kJ_{est}$ ), and percentage of energy intake in relation to the total daily intake for the days of the experiments ( $\%kJ_{tot}$ ). Superscripts in the  $kJ_{est}$  column indicate the number of trials where the animals were provided with food during the last minute of the procedure.

**Table 2. Trial information and water temperature for each experimental behaviour.**

| Experiment                    | Dive duration (min) | Data collection (min) | Water T (°C) |
|-------------------------------|---------------------|-----------------------|--------------|
| Floating at the water surface | -                   | 5.1-7.0               | 12.9-17.0    |
| Stationary dive               | 3.0-3.3             | 5.0-5.6               | 14.3-17.1    |
| Subsurface swimming           | 1.2-1.8             | 7.0-7.5               | 14.1-16.9    |

For trials included in the analysis (n = 15 for each metabolic experiment), ranges of dive duration for underwater behaviours, duration of data collection, and water temperature (Water T) for metabolic trials with three participating adult female Pacific walrus while floating at the water surface, and after performing stationary dives and subsurface swimming.

**Table 3. Results for linear models evaluating the relationship between metabolic rate and body mass for each in water behaviour.**

| Experiment                                        | $\chi^2$ | <i>p</i> -value | $\beta_0$        | $\log_{10}(M_b)$ | $R^2$ |
|---------------------------------------------------|----------|-----------------|------------------|------------------|-------|
| $\text{Log}_{10}(\text{MR}_{\text{Surface}})$     | 13.73    | <0.05           | $-2.91 \pm 0.81$ | $1.22 \pm 0.28$  | 0.60  |
| $\text{Log}_{10}(\text{DMR}_{\text{Stationary}})$ | 7.96     | <0.05           | $-1.55 \pm 0.71$ | $0.73 \pm 0.24$  | 0.41  |
| $\text{Log}_{10}(\text{DMR}_{\text{Swim}})$       | 27.60    | <0.05           | $-2.61 \pm 0.40$ | $1.13 \pm 0.14$  | 0.84  |

For each metabolic behaviour measured in three adult female Pacific walrus ( $n = 15$  per each metabolic experiment), linear models included  $\log_{10}$ -transformed ( $\log_{10}$ ) metabolic rate measured in  $1 \text{ O}_2 \text{ min}^{-1}$  (floating at the water surface:  $\text{MR}_{\text{Surface}}$ ; stationary dives:  $\text{DMR}_{\text{Stationary}}$ ; subsurface swimming:  $\text{DMR}_{\text{Swim}}$ ) as the dependent variables, and  $\log_{10}$  body mass ( $M_b$ , measured in kg) as the covariate. The results show the  $\chi^2$  for the log-likelihood ratio test and the obtained *p*-value when comparing the model including  $M_b$  with the model including only the intercept. The intercept ( $\beta_0$ ) the coefficient for  $\log_{10}(M_b)$  together with the standard error, and the r-squared ( $R^2$ ) resulting from the final models including  $M_b$  are additionally reported.

**Table 4. Summary of metabolic measurements**

| ANIMAL ID     | $\text{MR}_{\text{Surface}}$<br>( $1 \text{ O}_2 \text{ min}^{-1}$ ) | $\text{sMR}_{\text{Surface}}$<br>( $\text{ml O}_2 \text{ kg}^{-1} \text{ min}^{-1}$ ) | $\text{DMR}_{\text{Stationary}}$<br>( $1 \text{ O}_2 \text{ min}^{-1}$ ) | $\text{sDMR}_{\text{Stationary}}$<br>( $\text{ml O}_2 \text{ kg}^{-1} \text{ min}^{-1}$ ) | $\text{DMR}_{\text{Swim}}$<br>( $1 \text{ O}_2 \text{ min}^{-1}$ ) | $\text{sDMR}_{\text{Swim}}$<br>( $\text{ml O}_2 \text{ kg}^{-1} \text{ min}^{-1}$ ) |
|---------------|----------------------------------------------------------------------|---------------------------------------------------------------------------------------|--------------------------------------------------------------------------|-------------------------------------------------------------------------------------------|--------------------------------------------------------------------|-------------------------------------------------------------------------------------|
| 26005388      | $3.62 \pm 0.42$                                                      | $5.09 \pm 0.57$                                                                       | $3.55 \pm 0.32$                                                          | $5.04 \pm 0.41$                                                                           | $3.92 \pm 0.28$                                                    | $5.57 \pm 0.34$                                                                     |
| 26005389      | $5.57 \pm 0.70$                                                      | $5.61 \pm 0.86$                                                                       | $4.41 \pm 0.27$                                                          | $4.60 \pm 0.26$                                                                           | $5.57 \pm 0.23$                                                    | $5.76 \pm 0.22$                                                                     |
| 26005390      | $4.74 \pm 0.85$                                                      | $5.74 \pm 0.98$                                                                       | $3.48 \pm 0.50$                                                          | $4.25 \pm 0.61$                                                                           | $5.24 \pm 0.14$                                                    | $6.31 \pm 0.16$                                                                     |
| Overall range | 3.22-6.57                                                            | 4.29-6.92                                                                             | 2.90-4.69                                                                | 3.53-5.40                                                                                 | 3.50-5.80                                                          | 5.08-6.52                                                                           |

For each participating female Pacific walrus (Animal ID) and behaviour, average ( $\pm$  s.d) of measured metabolic rate (floating at the water surface:  $\text{MR}_{\text{Surface}}$ ; stationary dives:  $\text{DMR}_{\text{Stationary}}$ ; subsurface swimming:  $\text{DMR}_{\text{Swim}}$ ) and mass-specific metabolic rate (floating at the water surface:  $\text{sMR}_{\text{Surface}}$ ; stationary dives:  $\text{sDMR}_{\text{Stationary}}$ ; subsurface swimming:  $\text{sDMR}_{\text{Swim}}$ ).  $N = 5$  for all experiments with each individual. Overall ranges for each behaviour are also reported.

## Supplementary materials and methods

### Description for cADL calculation

The cADL was estimated by applying the methodology described in Kooyman (1989) and using specific estimates of tissues and oxygen-binding proteins proportions for walruses when available. The following assumptions were used to estimate the tissues (blood, muscle, and lungs) O<sub>2</sub> storage capacity and utilization during the dive. The total blood volume (BV, l) was calculated using the mass-specific estimation of 0.106 l blood kg<sup>-1</sup> (Lenfant et al., 1970). The estimated proportions of arterial and venous blood were considered as 33% and 67% respectively (Lenfant et al., 1970). The initial and final arterial haemoglobin (Hb) saturation were assumed to be 95% and 20%, respectively. The initial venous O<sub>2</sub> content was assumed to be 5 vol% less than the initial arterial O<sub>2</sub> content, with a final venous O<sub>2</sub> content of zero (Ponganis, 2011). The Hb content of adult female walruses has been reported to be 16.8 g Hb 100 ml<sup>-1</sup> of blood (Wołk and Kosygin, 1979), and the oxygen-binding capacity is 1.34 ml O<sub>2</sub> g<sup>-1</sup> Hb (Kooyman, 1989). The final equations utilized for the calculation of total volume of blood O<sub>2</sub> (l) were:

$$1) \text{ Arterial O}_2 = (BV \times M_b \times 0.33) \times (0.95 - 0.20 \text{ saturation}) \times ([\text{Hb}] \times 0.00134)$$

$$2) \text{ Venous O}_2 = (BV \times M_b \times 0.67) \times (\text{initial arterial O}_2 \text{ content} - 5\text{vol}\%)$$

The total muscle O<sub>2</sub> storage capacity was estimated by calculating the total muscular myoglobin (Mg) content. The total muscle mass (kg) was calculated as  $0.2410 M_b^{1.084}$ , an equation derived from excised tissues of Atlantic walruses (Knutsen and Born, 1994). The specific Mg content for the longissimus dorsi muscle in adult walruses has been estimated to be 3.8 g Mg 100 g<sup>-1</sup> of wet muscle mass (Noren et al., 2015) and was assumed equal for all muscle groups. However, this approach can potentially overestimate the overall muscle O<sub>2</sub> storage capacity as lower levels of Mg have been reported for non-swimming muscles in pinnipeds (Kanatous et al., 1999). The Mg has been reported to possess the same oxygen-binding capacity than that reported for Hg (Kooyman, 1989). Thus, the equation used for the calculation of total volume of muscle O<sub>2</sub> (l) was:

$$3) \text{ Muscle O}_2 = \text{Total muscle mass} \times ([\text{Mg}] \times 0.00134)$$

The total lung O<sub>2</sub> storage capacity was computed by calculating the estimated total lung capacity (TLC<sub>est</sub>, l) using previous equation for marine mammals (TLC<sub>est</sub> = 0.135 M<sub>b</sub><sup>0.92</sup>, Fahlman et al., 2011; Kooyman, 1973). The diving lung volume was assumed to be 50% of TLC<sub>est</sub> for pinnipeds with a 15% of available O<sub>2</sub> concentration in the lungs to be extracted during the dive (Ponganis, 2011). The final equation to yield the calculation of total volume of lung O<sub>2</sub> (l) was:

$$4) \text{ Lung O}_2 = M_b \times \text{TLC}_{\text{est}} \times 0.5 \times 0.15$$

All calculations were made using the overall average M<sub>b</sub> for the three participating female walrus during the experiments (835 kg). The total body O<sub>2</sub> storage capacity (37.62 l O<sub>2</sub>) was computed by summing the estimated O<sub>2</sub> storage capacity for each tissue. The cADL was computed by dividing the resulted total body O<sub>2</sub> storage capacity by the measured average DMR<sub>swim</sub> (4.91 l O<sub>2</sub> min<sup>-1</sup>).

## Supplementary tables

**Table S1. Body mass and respiratory variables for each metabolic experiment**

| Experiment                    | M <sub>b</sub><br>(kg)  | f <sub>R</sub><br>(breaths min <sup>-1</sup> ) | $\dot{V}CO_2$<br>(l CO <sub>2</sub> min <sup>-1</sup> ) | RER                        |
|-------------------------------|-------------------------|------------------------------------------------|---------------------------------------------------------|----------------------------|
| Floating at the water surface | 844 ± 124<br>(697-1030) | 5.8 ± 2.3<br>(3.1-9.6)                         | 4.47 ± 0.94<br>(2.93-5.92)                              | 0.97 ± 0.05<br>(0.90-1.04) |
| Stationary dive               | 827 ± 108<br>(697-967)  | 6.0 ± 1.9<br>(3.7-9.9)                         | 3.58 ± 0.62<br>(2.84-4.47)                              | 0.94 ± 0.07<br>(0.81-1.06) |
| Subsurface swimming           | 834 ± 113<br>(688-972)  | 6.6 ± 1.9<br>(3.6-9.7)                         | 4.58 ± 0.58<br>(3.67-5.49)                              | 0.94 ± 0.06<br>(0.85-1.05) |

For the three adult female Pacific walrus participating in metabolic measurements while floating at the water surface, and after performing stationary dives and horizontal subsurface swimming (n = 15 for each respirometry experiment), average (± s.d.) and ranges of: body mass (M<sub>b</sub>), respiratory frequency (f<sub>R</sub>), CO<sub>2</sub> production rate ( $\dot{V}CO_2$ ) and respiratory exchange ratio (RER).

**Table S2. Summary of metabolic measurements converted to daily energetic requirements using obtained RER.**

| ANIMAL ID  | MR <sub>Surface</sub><br>(MJ day <sup>-1</sup> ) | sMR <sub>Surface</sub><br>(kJ kg <sup>-1</sup> day <sup>-1</sup> ) | DMR <sub>Stationary</sub><br>(MJ day <sup>-1</sup> ) | sDMR <sub>Stationary</sub><br>(kJ kg <sup>-1</sup> day <sup>-1</sup> ) | DMR <sub>Swim</sub><br>(MJ day <sup>-1</sup> ) | sDMR <sub>Swim</sub><br>(kJ kg <sup>-1</sup> day <sup>-1</sup> ) |
|------------|--------------------------------------------------|--------------------------------------------------------------------|------------------------------------------------------|------------------------------------------------------------------------|------------------------------------------------|------------------------------------------------------------------|
| 26005388   | 109.3 ± 13.4                                     | 154.0 ± 17.9                                                       | 105.6 ± 9.4                                          | 149.9 ± 12.2                                                           | 117.9 ± 8.0                                    | 167.9 ± 9.4                                                      |
| 26005389   | 165.5 ± 20.2                                     | 166.6 ± 24.8                                                       | 132.5 ± 6.9                                          | 138.1 ± 6.7                                                            | 165.5 ± 5.9                                    | 171.0 ± 5.8                                                      |
| 26005390   | 141.5 ± 26.4                                     | 171.3 ± 30.7                                                       | 102.2 ± 13.4                                         | 124.8 ± 16.3                                                           | 154.0 ± 3.7                                    | 185.2 ± 4.6                                                      |
| Grand Mean | 138.8 ± 30.6<br>(95.0-193.7)                     | 164.0 ± 24.4<br>(126.3-203.9)                                      | 113.4 ± 16.9<br>(87.0-139.8)                         | 137.6 ± 15.6<br>(105.9-163.0)                                          | 145.8 ± 21.7<br>(106.5-172.7)                  | 174.7 ± 10.1<br>(154.8-190.1)                                    |

For each participating female Pacific walrus (Animal ID) and behaviour, average ( $\pm$  s.d) of measured metabolic rate (floating at the water surface: MR<sub>Surface</sub>; stationary dives: DMR<sub>Stationary</sub>; subsurface swimming: DMR<sub>Swim</sub>) and mass-specific metabolic rate (floating at the water surface: sMR<sub>Surface</sub>; stationary dives: sDMR<sub>Stationary</sub>; subsurface swimming: sDMR<sub>Swim</sub>). N = 5 for all experiments with each individual. Overall average ( $\pm$  s.d) and ranges are also reported for each behaviour.

## References

- Fahlman, A., Loring, S. H., Ferrigno, M., Moore, C., Early, G., Niemeyer, M., Lentell, B., Wenzel, F., Joy, R. and Moore, M. J.** (2011). Static inflation and deflation pressure-volume curves from excised lungs of marine mammals. *J. Exp. Biol.* **214**, 3822-3828.
- Kanatous, S. B., DiMichele, L. V., Cowan, D. F. and Davis, R. W.** (1999). High aerobic capacities in the skeletal muscles of pinnipeds: adaptations to diving hypoxia. *J. Appl. Physiol.* **86**, 1247-1256.
- Knutsen, L. Ø. and Born, E. W.** (1994). Body growth in Atlantic walruses (*Odobenus rosmarus rosmarus*) from Greenland. *J. Zool.* **234**, 371-385.
- Kooyman, G. L.** (1973). Respiratory adaptations in marine mammals. *Am. Zool.* **13**, 457-468.
- Kooyman, G. L.** (1989). *Diverse Divers: Physiology and Behavior*. Berlin: Springer-Verlag.
- Lenfant, C., Johansen, K. and Torrance, J. D.** (1970). Gas transport and oxygen storage capacity in some pinnipeds and the sea otter. *Respir. Physiol.* **9**, 277-286.
- Noren, S. R., Jay, C. V., Burns, J. M. and Fischbach, A. S.** (2015). Rapid maturation of the muscle biochemistry that supports diving in Pacific walruses (*Odobenus rosmarus divergens*). *J. Exp. Biol.* **218**, 3319-3329.
- Ponganis, P. J.** (2011). Diving mammals. *Compr. Physiol.* **1**, 517-535.
- Wolk, E. and Kosygin, G. M.** (1979). A hematological study of the walrus, *Odobenus rosmarus*. *Acta Theriol. Sin.* **24**, 99-107.
